# Supplementary material for: Prioritizing Heat Adaptation Measures acrossIndian Cities: A Benefit-Cost Analysis
Source: Research Square preprint supplement (doi:10.21203/rs.3.rs-5618553/v1), 2024-12-19
Supplement: Supplementary file 1 [file 57d12bd674957de92af2bc20.pdf]

# Supplementary Information

## Supplementary Information 1

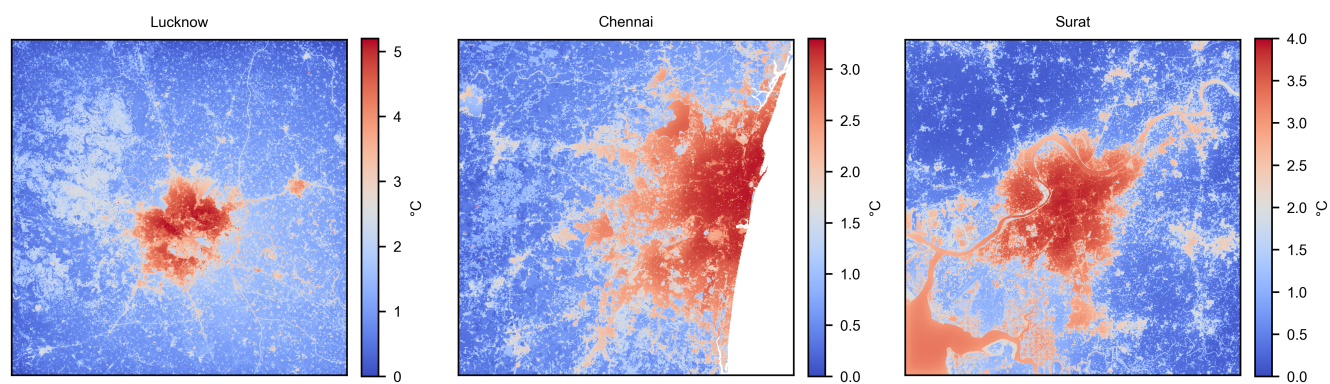

**Fig. 1: Urban heat island during night, at present for three Indian cities.**  
Present data is averaged over 20 years (2001-2020).

## Supplementary Information 2

**Table 1: Distribution of Workforce by Sector and Work Intensity in all three cities**

Economic losses were estimated by segmenting the working population (ages 15-65, about 65% of the city population) by industry, work intensity (intense, moderate, light), and location (urban/rural) for all climate scenarios and future periods. Employment rates from the PLFS are: Surat (99%), Chennai (95%), and Lucknow (97%). Losses were calculated using the number of workers in each sector, lost working hours based on place and intensity, and average daily earnings for casual labor, excluding public works, taken from the PLFS.

| Type of Work                                                                   | Work Intensity   | Lucknow (%)  | Chennai (%)  | Surat (%)    |
|--------------------------------------------------------------------------------|------------------|--------------|--------------|--------------|
| A - Agriculture, Forestry and Fishing                                          | Intense - rural  | 54.6         | 31.0         | 41.2         |
| B - Mining and Quarrying                                                       | Intense - rural  | 0.0          | 0.2          | 0.2          |
| C - Manufacturing                                                              | Indoor - NA      | 8.3          | 17.4         | 24.2         |
| D - Electricity, Gas, Steam                                                    | Intense - urban  | 0.2          | 0.3          | 0.3          |
| E - Water Supply; Sewerage, Waste Management and Remediation Activities        | Moderate - urban | 0.3          | 0.5          | 0.1          |
| F - Construction                                                               | Intense - urban  | 13.5         | 16.5         | 6.7          |
| G - Wholesale and Retail Trade; Repair of Motor Vehicles and Motorcycles       | Indoor - NA      | 10.1         | 10.2         | 10.3         |
| H - Transportation and Storage                                                 | Moderate - urban | 3.1          | 5.4          | 4.3          |
| I - Accommodation and Food Service Activities                                  | Indoor - NA      | 1.2          | 3.0          | 1.4          |
| J - Information and Communication                                              | Indoor - NA      | 0.4          | 3.1          | 0.7          |
| K - Financial and Insurance Activities                                         | Indoor - NA      | 0.4          | 1.7          | 1.3          |
| L - Real Estate Activities                                                     | Indoor - NA      | 0.1          | 0.2          | 0.1          |
| M - Professional, Scientific and Technical Activities                          | Indoor - NA      | 0.5          | 0.9          | 0.6          |
| N - Administrative and Support Service Activities                              | Indoor - NA      | 0.8          | 0.8          | 1.0          |
| O - Public Administration and Defence; Compulsory Social Security              | Indoor - NA      | 0.9          | 1.3          | 1.7          |
| P - Education                                                                  | Indoor - NA      | 2.2          | 2.9          | 1.8          |
| Q - Human Health and Social Work Activities                                    | Light - urban    | 0.8          | 1.4          | 1.6          |
| R - Arts, Entertainment and Recreation                                         | Light - urban    | 0.2          | 0.2          | 0.1          |
| S - Other Service Activities                                                   | Light - urban    | 1.9          | 1.8          | 1.6          |
| T - Activities of Households as Employers; Undifferentiated Goods and Services | Indoor - NA      | 0.4          | 1.1          | 0.9          |
| U - Activities of Extraterritorial Organizations                               | Indoor - NA      | 0.0          | 0.0          | 0.0          |
| <b>Total</b>                                                                   |                  | <b>100.0</b> | <b>100.0</b> | <b>100.0</b> |

### Supplementary Information 3

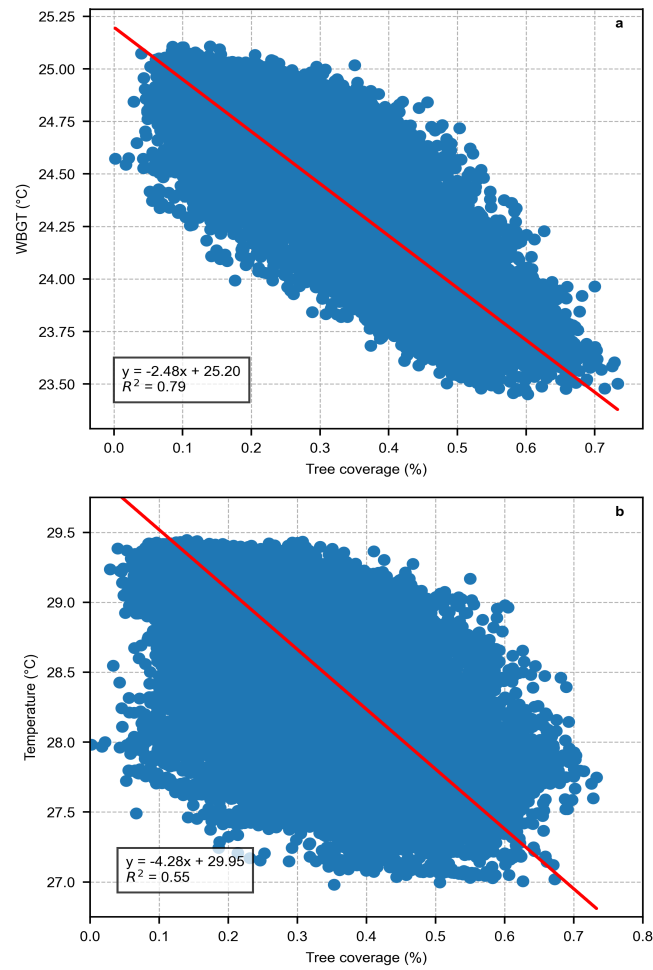

**Fig. 2: Tree Canopy Coverage and its impact on heat stress and temperature.** **a**, The relationship between tree canopy coverage and heat stress, as measured by the WBGT index. **b**, The relationship between tree canopy coverage and temperature. In both panels, the blue points represent the original data points, and the red line represents the fitted curve.

## Supplementary Information 4

**Table 2: Input Datasets Used for UrbClim**

| Type                    | Source                               | Spatial Resolution |
|-------------------------|--------------------------------------|--------------------|
| Land use                | ESA WorldCover (Zanaga et al., 2021) | 10 m               |
| Soil Sealing            | Zhang et al. (2020)                  | 30 m               |
| Vegetation (NDVI)       | Landsat 8 archive                    | 30 m               |
| Anthropogenic heat flux | Jin et al. (2019)                    | 30 m               |
| Population density      | Corbane et al. (2021)                | 10 m               |
| Soil texture            | Hengl and MacMillan (2019)           | 250 m              |
| Digital elevation model | Copernicus DEM                       | 30 m               |

### Supplementary Information 5: Converting prices to India

To convert the price from one country to another, the following ratio is used:

$$\text{VOLY}^A = \frac{\text{VOLY}^B}{\text{PPP}^B} \times \text{PPP}^A$$

Where:

- **A**: Refers to the country where the price or value is being converted to.
- **B**: Refers to the country from which the price or value is being converted.

Purchasing power parities (PPPs) are the rates of currency conversion that equalize the purchasing power of different currencies by adjusting for differences in price levels between countries. The data used here are sourced from the World Bank <https://data.worldbank.org/indicator/NY.GDP.PCAP.PP.CD>.
